# Supplementary material for: Large-area perovskite solar cells with CsxFA1−xPbI3−yBry thin films deposited by a vapor–solid reaction method
Source: Royal Society of Chemistry journal article supplement (doi:10.1039/c8ta06557h), 2018-01-01
Supplement: c8ta06557h1.pdf [file c8ta06557h1.pdf]

## Supporting Information

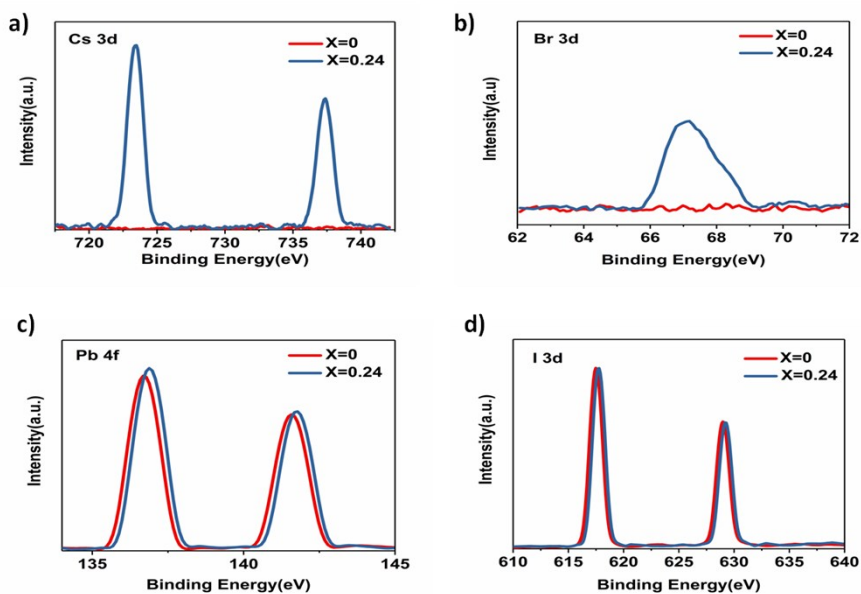

Fig. S1 XPS spectra of the perovskite films with  $x=0$  and  $x=0.24$  for (a) Cs 3d, (b) Br 3d, (c) Pb 4f, (d) I 3d.

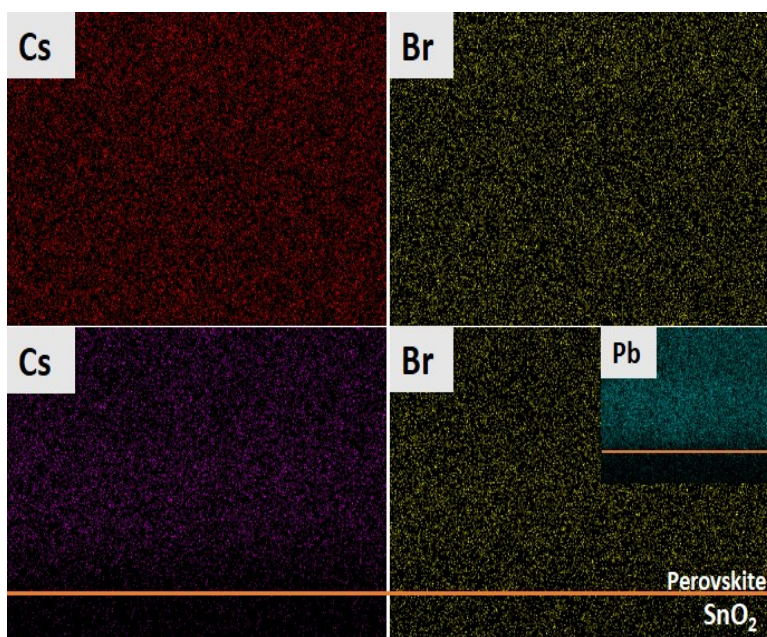

Fig.S2 EDS mapping of Cs<sub>x</sub>FA<sub>1-x</sub>PbI<sub>3-x</sub>Br<sub>x</sub> perovskite film from surface and cross-section

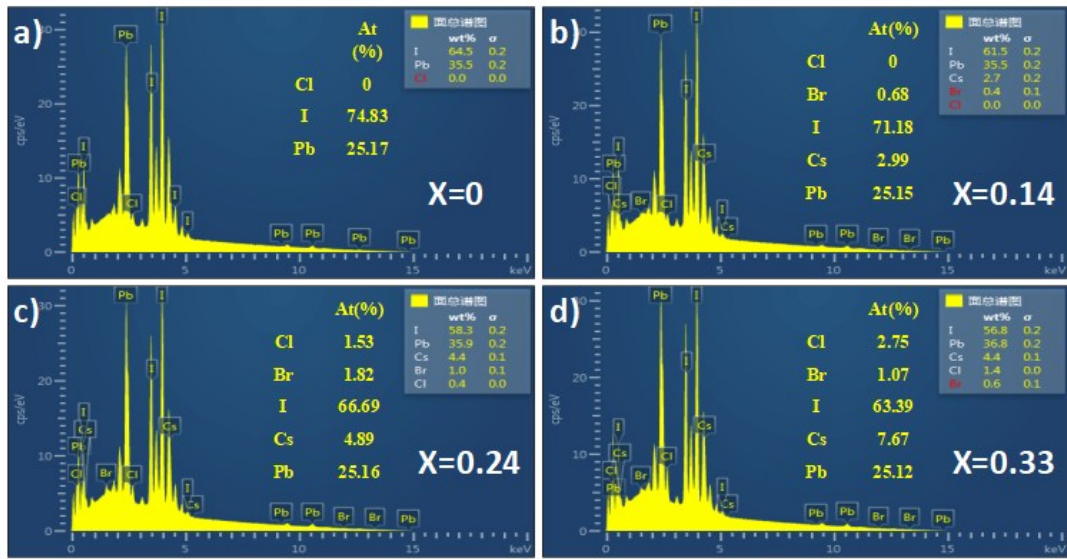

Fig. S3 The elements content of perovskite films with X=0, X=0.14, X=0.24 and x=0.33, which prepared by solid-vapor reaction in FAcI/FAI vapor.

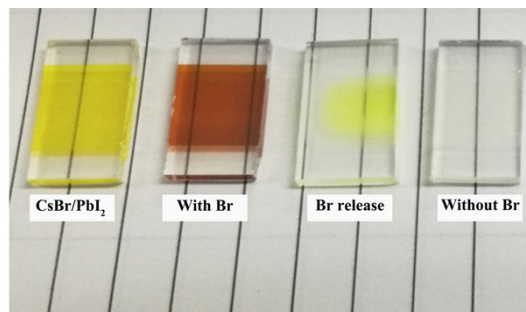

Fig. S4 The color evolution of CsBr/PbI<sub>2</sub> composite film reacted with pure FAcI gas.

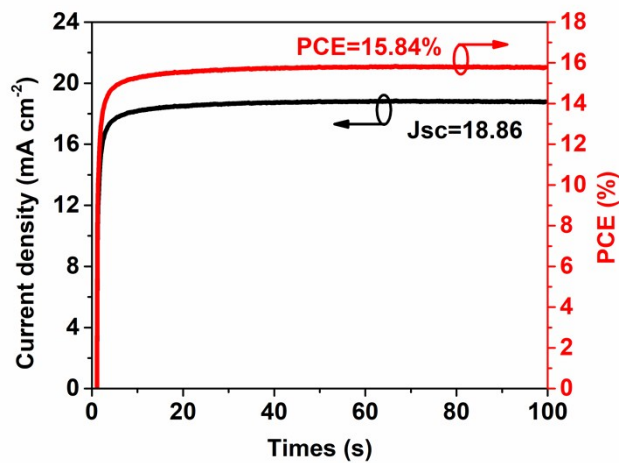

Fig. S5 Steady-state current of Cs<sub>0.24</sub>FA<sub>0.76</sub>PbI<sub>3-y</sub>Br<sub>y</sub> perovskite cell.

**Table S1** Comparison of PL decay fitting parameters between different perovskite films.

| <b>Lifetime</b>                | <b>X=0</b>   | <b>X=0.14</b> | <b>X=0.24</b> | <b>X=0.33</b> |
|--------------------------------|--------------|---------------|---------------|---------------|
| <b><math>\tau</math> 1(ns)</b> | <b>4.3</b>   | <b>3.94</b>   | <b>10.68</b>  | <b>5.75</b>   |
| <b><math>\tau</math> 2(ns)</b> | <b>33.57</b> | <b>273.01</b> | <b>306.5</b>  | <b>257.72</b> |
